# Supplementary material for: Genome-wide identification of autosomal genes with allelic imbalance of chromatin state
Source: PLoS One. 2017 Aug 10;12(8):e0182568. doi: 10.1371/journal.pone.0182568 (PMC5552117; doi:10.1371/journal.pone.0182568)
Supplement: S5 Table — Gene name, number of fragments per kilobase per million (FPKM) based on all reads, counts of allele-specific reads assigned to maternal (mus) and paternal (cas) alleles in two replicates, log-ratio of average allelic read counts, and false discovery rate (FDR) of the skew are indicated. (XLSX) [file pone.0182568.s019.xlsx]

## Sheet: Expression skew
	Composite FPKM	Mus1	Cas1	Mus2	Cas2	log2(mus/cas)	FDR
0610011L14Rik	2.1292	165	76	183	76	1.30694	3.85772e-08
0610037L13Rik	2.78419	193	80	170	90	1.16661	2.58569e-06
1110021L09Rik	2.61631	110	270	106	203	-1.02586	1.36714e-07
1110032A03Rik	0.374592	64	28	59	36	1.28398	0.0374025
1190007I07Rik	1.15482	16	39	9	50	-1.65903	0.00528724
1500003O03Rik	4.66323	241	36	192	41	2.50484	1.25934e-23
1500032L24Rik	4.81492	14	2	15	3	2.59162	0.0200916
1600027N09Rik	2.20024	64	28	70	32	1.25078	0.000998768
1700024P16Rik	-0.0130439	21	75	8	63	-1.86054	1.02223e-07
1700049G17Rik	-1.55701	52	9	66	23	3.5004	1.68722e-05
2010015L04Rik	-0.234086	49	6	42	4	4.4257	2.73298e-08
2010107H07Rik	3.02307	9	49	6	36	-2.39984	8.97358e-06
2010305A19Rik	1.94016	105	53	92	34	1.34398	0.000113621
2400001E08Rik	5.17451	29	1	15	0	8.36804	0.000158191
2410127L17Rik	1.76364	127	60	108	58	1.11311	0.000320576
2510002D24Rik	0.647521	39	13	37	13	1.8921	0.00282765
2510006D16Rik	3.8838	482	96	446	91	2.36792	5.28752e-56
2610002D18Rik	2.65839	101	65	102	43	1.03108	0.0117862
2610318N02Rik	2.82542	17	51	14	40	-1.46678	0.001297
2610524H06Rik	2.77324	39	2	57	0	7.08733	3.3628e-09
2700062C07Rik	3.37018	24	70	22	69	-1.52147	9.27194e-06
2700073G19Rik	1.78846	59	28	45	26	1.06944	0.0499736
2810055F11Rik	1.6592	18	113	10	108	-2.73022	3.37337e-17
2810055G20Rik	1.37528	42	107	55	157	-1.25896	3.56327e-07
3110040N11Rik	1.15073	43	16	43	22	1.38206	0.0222003
3230401D17Rik	3.2518	63	152	60	140	-1.16161	6.23575e-08
4930473A06Rik	-1.95356	17	3	15	2	3.76033	0.00926512
5031425E22Rik	2.20163	136	22	121	25	2.61186	1.59375e-15
6720456B07Rik	5.85722	667	330	624	259	1.1377	5.76978e-26
9130401M01Rik	4.04584	234	115	226	88	1.24191	8.07123e-10
9230112E08Rik	0.80087	34	10	45	24	1.58734	0.0262542
A230050P20Rik	-1.43304	0	28	1	38	-3.99719	2.98604e-08
A530016L24Rik	-2.56017	0	15	0	18	-3.43227	0.000176716
A530054K11Rik	1.51768	103	47	102	40	1.37837	1.7079e-05
A930004D18Rik	0.909672	74	26	63	25	1.6797	0.000166218
A930033H14Rik	-0.0177687	14	1	14	2	4.47193	0.00964464
A930038C07Rik	-0.278462	22	6	47	5	3.55691	0.00716493
Abcb8	1.52943	31	81	53	105	-1.02183	0.000119465
Abi3bp	1.30175	84	243	305	768	-1.1704	3.11708e-18
Ablim1	1.2142	290	130	469	314	1.05608	1.25779e-07
Acacb	-2.37258	37	4	53	6	3.76061	3.65403e-07
Acad12	-0.650944	5	33	15	52	-1.4224	3.06405e-05
Acap3	2.20903	285	108	282	100	1.5578	1.14026e-18
Acot1	0.0456829	1	18	4	22	-2.46344	0.00135777
Acot13	3.17947	76	44	81	35	1.08136	0.00850092
Acsf2	1.53651	143	54	186	77	1.49859	8.58768e-10
Actb	12.2831	1323	235	1170	265	1.13361	3.44979e-134
Actg2	4.94029	632	214	311	116	1.50669	8.68319e-21
Acy1	3.14428	237	15	211	19	3.89284	4.49135e-41
Adam15	2.12584	67	28	91	39	1.35626	0.000213626
Adamts1	5.2138	3091	1460	2958	1432	1.07668	3.51769e-118
Adamts12	2.86838	634	226	608	189	1.67755	2.15711e-44
Adamts16	-0.307868	14	88	41	170	-1.61505	1.55018e-13
Adamts18	-1.90356	23	3	21	2	4.05698	0.000375632
Adamts2	2.01676	416	177	392	168	1.36232	9.5239e-21
Adamts7	0.477266	147	78	159	92	1.17139	8.83601e-05
Adat1	0.248128	84	30	66	23	1.95784	1.79622e-05
Adprhl2	2.61843	72	28	79	40	1.25161	0.00104455
Adssl1	0.315017	6	32	2	52	-2.89838	6.64287e-05
Afap1l2	-1.32828	26	6	58	16	3.33831	0.00120275
Agk	1.55593	60	7	37	10	2.76651	0.000248529
Agpat9	0.829808	32	79	44	116	-1.08709	2.71585e-05
Ahcy	3.0062	82	233	78	226	-1.42632	8.92287e-17
AI429214	0.26105	51	24	37	19	1.40282	0.0387439
Akap2	3.61002	23	8	30	12	1.48874	0.0302676
Akna	-1.42404	36	10	39	18	2.7884	0.0138386
Akr1b10	1.29577	56	28	71	32	1.23131	0.0061352
Akr1c19	-0.109339	1	44	0	17	-4.85249	4.29482e-05
Alcam	2.41494	351	95	136	43	1.8855	9.81529e-12
Alyref	6.5151	23	93	19	68	-1.98018	4.36344e-07
Ank3	0.421082	237	2	319	1	6.56516	1.13709e-66
Ankle1	0.233455	40	3	58	6	4.66551	1.23071e-08
Ankrd42	-0.255855	10	55	18	66	-1.54129	5.0838e-07
Anp32b	4.63849	277	85	380	90	1.91957	6.25291e-24
Anpep	-2.06028	20	0	27	9	4.09139	0.00754969
Anxa8	5.98608	166	825	239	935	-2.16251	3.35749e-96
Ap2m1	5.97357	556	289	480	217	1.02767	1.95598e-19
Ap3s1	3.80762	221	46	256	78	2.02027	2.33845e-22
Apbb1ip	0.450048	90	3	116	4	6.09269	2.18317e-22
Apeh	3.40464	158	2	179	4	6.43649	2.27553e-43
Api5	5.69599	691	363	674	315	1.01088	2.61387e-23
Apob	-2.10697	36	0	51	0	4.84768	1.38627e-10
Apol10b	0.346092	1	88	3	34	-3.70104	4.35829e-07
Apol8	-1.08065	22	7	87	32	2.46284	0.0145778
Arhgap24	0.122621	94	34	76	41	1.58101	0.00323999
Arhgdib	1.12425	69	22	72	33	1.60324	0.000433133
Arl15	3.28705	191	68	249	122	1.32213	1.85626e-10
Asb4	0.207897	120	2	126	0	6.35236	3.00203e-32
Asb5	2.60585	157	46	225	57	1.99175	1.28605e-14
Ass1	3.19977	70	180	43	152	-1.51637	1.22725e-11
Atp5g1	4.92812	94	4	112	1	5.95236	1.92039e-22
Atp5h	6.11591	154	40	199	24	2.48964	3.517e-16
Atp6v0c	4.32466	239	667	239	601	-1.36275	1.11162e-35
Atp6v1g1	5.18325	44	131	37	164	-1.8554	1.4762e-10
AU022252	1.05245	295	106	241	93	1.66207	1.69964e-15
AU040320	2.45271	233	119	255	129	1.06326	5.69621e-09
Aurkaip1	5.00267	194	60	167	58	1.6224	1.07425e-12
Auts2	-0.538801	58	0	78	1	6.11933	4.50828e-17
AW551984	-2.49954	0	16	0	15	-3.56931	0.000232159
B3galtl	3.91713	491	1185	553	1325	-1.20783	6.02078e-65
B4galt4	1.26969	166	72	158	81	1.24606	2.35016e-06
Bach2	1.57189	119	41	177	84	1.47998	3.59276e-08
BC003266	3.21553	74	36	68	38	1.02574	0.00936113
BC068281	2.15042	74	148	69	161	-1.00193	2.51227e-06
Bdh2	1.66451	49	101	37	101	-1.10876	7.16058e-05
Bdkrb2	-0.990023	7	25	2	13	-1.37714	0.0167219
Birc3	0.041305	78	5	99	7	5.14418	4.16676e-17
Bloc1s2	2.95988	110	20	84	18	2.42973	1.08278e-10
Brp44l	0.184346	41	12	57	8	3.18285	0.000208355
Bsdc1	2.50997	199	94	233	116	1.12563	4.99062e-09
Bst2	0.11756	25	4	19	1	4.57013	0.000353599
Btg3	1.29248	2	155	10	170	-4.18667	1.23708e-37
C1s	-1.14492	17	2	23	7	3.60599	0.0110145
C230096C10Rik	2.63165	732	333	706	263	1.36295	5.70042e-34
Cabp5	-1.60276	0	20	0	16	-4.69708	8.70567e-05
Calm2	7.89521	26	189	25	194	-2.90055	1.03462e-30
Camk4	-0.11947	13	132	15	113	-2.38754	6.23672e-19
Cbr1	2.20866	51	3	38	1	5.51015	6.69372e-10
Cbr2	4.54469	1	16	0	19	-7.62442	0.000654489
Cbs	-0.964637	8	46	10	45	-1.40449	6.8553e-06
Ccbe1	-0.211941	147	16	40	1	4.38067	1.79555e-10
Ccdc122	0.179934	22	2	46	1	5.51788	9.58413e-05
Ccdc124	4.91724	361	32	357	25	3.72316	2.24185e-70
Ccdc125	-1.27361	29	1	45	1	4.91946	2.10662e-07
Ccdc141	0.682322	49	177	85	252	-1.37636	2.25377e-17
Ccdc163	1.51268	75	31	59	32	1.23243	0.0113017
Ccdc21	2.35548	133	72	152	78	1.01251	6.99811e-05
Ccdc39	-1.73175	23	0	19	3	4.77148	0.00186348
Ccdc46	1.0051	14	71	22	83	-1.81308	7.69584e-09
Ccdc58	3.2931	5	22	7	23	-1.85225	0.0122917
Ccdc68	-1.47678	19	0	18	0	5.39019	3.25653e-05
Ccdc72	6.05842	91	18	109	11	2.83886	3.33978e-12
Ccdc80	4.90255	191	1388	388	2072	-2.58809	1.71634e-222
Ccdc84	1.6432	52	22	51	22	1.37207	0.00323999
Ccna2	6.35031	1650	710	1268	539	1.17783	2.37051e-66
Cd1d1	-0.850466	28	5	36	5	4.07922	0.000172551
Cd200	1.31287	73	0	85	1	7.75933	1.64777e-21
Cd24a	7.84018	976	173	1010	161	2.49455	9.33756e-135
Cd63	8.58727	1310	2374	1126	2234	-1.02951	2.22938e-68
Cd9	5.20368	52	28	66	29	1.04679	0.0173093
Cdan1	1.05713	81	13	67	24	2.35477	2.14617e-05
Cdc34	5.47542	421	108	360	146	1.64024	5.15155e-21
Cdk11b	-0.0299245	58	29	81	30	1.68874	0.00495335
Cdk2ap1	4.7498	124	382	131	404	-1.6036	1.40815e-30
Cdkn1c	3.4028	52	1	53	0	7.9542	6.92076e-14
Cdo1	2.85993	22	43	28	98	-1.31291	0.0212975
Cebpb	3.56548	54	18	94	37	1.52086	7.16794e-05
Celf2	3.93186	397	180	469	273	1.01385	3.16665e-12
Ces1g	-0.961044	53	12	14	2	3.4832	0.00797585
Cetn4	-0.498611	9	29	8	42	-1.37969	0.00343208
Cfl1	9.93194	27	715	20	631	-5.05969	5.25905e-157
Cftr	0.645542	170	67	161	93	1.35882	6.45841e-05
Chchd2	6.46982	115	328	148	296	-1.30459	9.8002e-12
Chid1	1.88736	48	134	66	118	-1.02358	0.000377839
Chst3	-0.172342	100	26	136	37	2.51439	9.56798e-11
Cish	-1.62765	42	6	42	14	3.40287	0.000559149
Clca4	-1.686	0	36	0	18	-4.51016	2.21986e-05
Cldn12	4.22226	1048	2113	961	2272	-1.07867	4.28611e-80
Cldn15	-0.550115	4	19	5	34	-1.72654	0.00516596
Clip4	0.861088	145	75	239	109	1.28391	8.42334e-06
Cmpk1	4.01879	480	222	410	205	1.1103	6.23667e-16
Cnih	5.70649	1079	234	876	235	2.05511	5.67986e-86
Cnn1	2.38286	284	51	137	17	2.96675	1.44835e-23
Cnp	1.87671	132	28	156	35	2.38801	1.53546e-16
Col14a1	-1.82012	34	6	64	3	4.07792	2.42014e-05
Col18a1	2.42461	77	495	51	317	-2.49229	6.71539e-47
Col27a1	-1.28185	59	16	104	30	3.19034	2.02026e-06
Col2a1	5.49218	1689	617	2024	612	1.60862	5.5129e-113
Col4a1	3.41078	681	261	668	211	1.59549	8.86784e-43
Col4a2	3.49101	914	435	723	327	1.17629	5.95916e-34
Col7a1	3.39754	834	390	1050	527	1.11666	1.72741e-36
Commd5	2.55878	8	22	4	24	-1.90579	0.0269619
Copz2	3.91526	145	20	196	35	2.72104	1.15697e-23
Coro6	-0.151674	10	44	12	41	-1.39997	0.000216264
Cotl1	5.49021	836	287	459	220	1.30678	1.92417e-19
Cox11	1.84767	65	37	75	38	1.02254	0.0141241
Cox6a1	7.82484	70	180	91	220	-1.41829	1.31209e-11
Cox7a2l	4.62479	372	165	411	174	1.23418	1.49549e-18
Cox7c	6.44811	234	479	210	479	-1.13472	1.92767e-19
Cp	-0.0217146	58	36	174	80	1.37167	0.0457015
Cpn1	-1.07282	1	45	0	15	-3.97516	0.00015813
Cpt1c	2.83097	52	125	78	200	-1.21398	1.49744e-07
Cradd	0.156622	34	7	39	14	2.29594	0.00180497
Creld1	-0.0756921	23	7	32	7	2.60672	0.00988246
Csad	1.80982	48	27	68	34	1.03505	0.0340403
Csdc2	0.6517	11	34	14	50	-1.40532	0.00181175
Csf1r	-1.49	22	1	39	1	4.7226	1.68946e-05
Csmd3	-0.631747	0	31	0	49	-5.85326	3.96968e-09
Csnk2a1	5.23168	1834	300	1343	235	2.5902	8.21963e-187
Csrp2bp	2.39219	291	168	253	118	1.03254	3.9563e-08
Ctbp2	3.33394	19	45	35	71	-1.05799	0.00439521
Ctbs	-0.360403	20	6	25	7	2.46093	0.0197239
Ctdnep1	5.74712	23	2	25	0	7.96635	5.3979e-05
Cthrc1	6.1882	1540	64	1918	87	4.53755	0
Ctsc	2.4663	28	71	29	101	-1.44651	5.08668e-05
Ctsh	2.82287	86	226	72	155	-1.16067	1.3868e-07
Ctsz	2.41515	53	0	51	1	8.14565	1.33022e-13
Cxcl1	3.85615	182	1	423	1	9.26168	4.42481e-52
Cxcl5	3.66677	30	238	79	587	-2.848	2.86516e-40
Cyb5	5.3708	527	5	448	7	6.55028	5.18598e-121
Cyb5d1	0.971305	24	4	26	6	2.69636	0.00157487
Cycs	1.78635	19	55	11	47	-1.64481	9.56765e-05
Cyp4f16	1.29843	79	25	85	55	1.32735	0.0235066
Cyp4v3	1.88454	31	217	65	274	-2.18072	1.1863e-30
Cyp7b1	0.869504	9	30	9	78	-2.07208	0.00227262
D11Wsu99e	2.30612	54	145	50	140	-1.32529	5.85632e-10
D130062J21Rik	-0.669218	30	8	60	20	2.60944	0.00109041
D930014E17Rik	1.56601	64	8	35	15	2.31376	0.0120717
Dazap2	5.90544	106	462	111	241	-1.61852	1.78358e-11
Dbp	0.669373	49	2	26	0	6.26013	1.11961e-07
Dclk1	3.7129	208	607	251	846	-1.58754	6.54243e-45
Dctn3	4.0836	1	238	2	158	-6.51979	2.27553e-43
Ddhd1	1.20125	131	61	138	68	1.236	5.35918e-06
Dedd2	-0.504312	26	1	35	0	5.63427	1.41063e-06
Def6	-0.235622	3	20	1	15	-2.49606	0.00215987
Depdc7	2.88189	43	181	24	116	-2.05466	6.81084e-15
Dffa	0.567472	78	20	63	21	2.14207	1.48338e-05
Dfna5	0.401323	0	40	2	57	-5.5278	9.40479e-12
Dgat2	1.3567	22	4	23	6	2.46758	0.00562389
Dhcr7	3.72955	99	251	119	326	-1.33987	1.41389e-15
Dhrs7	2.5429	11	28	13	44	-1.46966	0.0167768
Dlk1	6.23564	193	1045	295	1306	-2.33006	2.85631e-140
Dmrta2	-0.676319	31	0	46	2	5.83516	4.00118e-09
Dnajc12	0.643583	13	41	20	58	-1.26797	0.000467376
Dnajc24	1.44273	41	17	38	14	1.52771	0.00666122
Dnajc30	3.00066	20	0	28	0	9.66276	6.00647e-06
Dpagt1	4.53581	495	167	494	152	1.67762	1.5808e-37
Dpp7	1.74918	68	32	51	11	1.85897	0.000940469
Dtnbp1	4.50932	58	26	66	32	1.1322	0.00293162
Dusp18	1.02484	68	167	47	179	-1.39198	3.94655e-10
Dysf	3.37157	438	1318	462	1508	-1.57269	1.02503e-100
E2f6	2.70531	88	19	79	22	2.13762	3.94213e-08
Ebf3	2.50391	103	255	109	246	-1.14877	1.43171e-12
Ebna1bp2	4.65623	660	294	465	220	1.14025	3.17133e-20
Echdc2	3.15194	235	122	258	139	1.00784	1.88593e-08
Ecm1	4.25068	168	370	190	387	-1.03167	1.06253e-15
Edf1	5.55079	1	15	1	81	-5.04034	0.00116805
Egfr	3.84958	487	1163	647	1498	-1.1721	1.42048e-62
Egln3	0.665677	17	66	14	67	-1.74313	2.1111e-07
Eif3f	3.08723	53	229	56	219	-1.96048	4.95906e-23
Eif3h	5.84618	319	855	366	949	-1.40455	9.0354e-56
Eif3m	5.72225	257	29	388	29	3.47781	1.10196e-45
Eif4a1	8.12918	764	73	580	55	3.34045	4.42923e-110
Eif4g3	0.783311	228	127	190	110	1.04973	1.38108e-05
Eif5a	8.32742	2267	450	2026	428	2.23473	1.28181e-245
Elmod3	0.694537	54	32	60	26	1.27354	0.0368791
Eltd1	0.286358	112	2	96	8	5.45026	1.95934e-19
Emb	5.40248	1259	520	1432	512	1.39359	2.46102e-69
Eme2	1.58393	325	5	349	12	6.48027	8.261e-86
Entpd4	3.70505	87	22	120	33	1.98232	1.11014e-09
Epha7	0.843679	149	46	170	78	1.66829	2.02242e-08
Erf	4.27848	711	237	758	221	1.71683	1.91452e-54
Erh	3.68198	309	17	282	26	3.91963	2.72032e-54
Ezr	2.02825	259	34	254	26	3.39947	6.38414e-43
F2rl1	0.032124	57	13	71	24	2.31728	4.95888e-06
Fabp4	1.68163	25	11	31	3	2.55442	0.0444206
Fahd1	0.576295	26	0	27	0	7.27398	1.64747e-07
Fam100b	1.86613	14	81	9	75	-2.5524	6.64972e-12
Fam111a	4.92553	659	1350	611	1298	-1.05568	2.33984e-53
Fam115c	1.52388	217	16	237	12	4.66719	4.4682e-45
Fam119b	-0.441526	8	38	11	26	-1.07605	0.0323262
Fam126a	3.59032	200	730	176	793	-1.9551	3.27777e-70
Fam134b	2.3535	67	20	118	40	1.75665	1.45463e-06
Fam18a	0.0988643	67	0	78	4	6.44819	5.20932e-18
Fam20a	-0.0617085	48	2	61	3	5.65644	1.16271e-11
Fam46b	0.78893	0	78	1	92	-6.36974	5.43307e-23
Fam59b	1.05554	31	120	37	148	-1.69792	7.92333e-13
Fam60a	1.24353	13	167	18	120	-2.7792	7.55794e-19
Fam82a1	0.941286	1	47	4	38	-3.56913	2.06541e-07
Fam96a	4.13833	75	38	77	38	1.05676	0.0021291
Fas	2.17801	42	100	64	176	-1.24528	3.96321e-06
Fbl	4.76335	414	176	306	181	1.00202	6.20992e-08
Fbln1	2.83524	71	22	77	26	1.69956	2.73586e-06
Fbln2	6.03398	6760	31	7928	40	7.96962	0
Fbxl15	1.19416	37	1	36	2	5.5587	2.25666e-08
Fbxo17	1.94678	70	174	72	149	-1.04462	8.31983e-07
Fbxo2	2.61043	50	0	60	1	8.1586	1.07506e-14
Fbxo32	2.34732	291	6	132	4	6.21519	3.49526e-33
Fbxo5	5.08776	14	206	8	129	-3.88917	2.96526e-28
Fez1	2.90119	15	131	6	74	-3.20218	3.22708e-15
Fez2	5.31299	1161	552	809	385	1.06189	3.91592e-34
Fgf10	3.90779	31	271	41	362	-3.06886	7.25806e-48
Fgf7	4.11051	363	88	344	116	1.84784	2.64632e-26
Fgfr2	3.05787	175	394	165	472	-1.25388	1.52145e-19
Fhdc1	1.80485	124	70	143	67	1.09507	0.000320576
Fktn	1.67558	291	141	258	89	1.45151	2.34134e-12
Foxd1	5.24582	247	672	297	668	-1.29917	1.75052e-32
Fst	2.20377	72	6	115	17	3.42508	1.08389e-14
Fstl3	3.03995	168	63	171	61	1.52829	1.80731e-11
Ftl1	8.62777	9774	2382	8860	2328	1.86506	0
Fto	3.90449	371	828	403	957	-1.14643	1.72154e-39
Fuca1	3.43571	168	87	234	107	1.10736	1.48142e-06
Fus	5.22328	813	342	862	415	1.16159	2.01839e-35
Fut10	2.57772	345	801	323	761	-1.14082	3.47419e-40
Fyb	1.93436	4	52	2	72	-3.96226	5.39771e-11
Gabarapl2	1.27917	106	42	93	39	1.47262	9.40736e-06
Gabra5	-0.535688	36	0	35	0	6.22405	3.98744e-10
Gabrb3	-0.513005	78	2	84	1	5.58114	3.94901e-20
Gad1	-1.97926	0	15	0	17	-4.30675	0.000195058
Gadd45a	1.99346	48	13	71	18	2.09019	2.23263e-05
Galnt7	1.51354	99	46	101	54	1.14007	0.000506472
Gapdh	7.58953	2009	159	1637	140	3.51799	0
Gata3	1.52757	21	90	8	85	-2.48656	1.10919e-10
Gatad1	5.32033	33	56	31	81	-1.06633	0.0311673
Gba2	1.31271	91	44	75	37	1.18593	0.00109996
Gbp1	-1.99649	13	3	23	2	3.91714	0.0340403
Gbp2	2.27169	13	42	29	79	-1.45004	0.000288065
Gbp3	-0.53025	6	61	10	92	-2.2624	7.72642e-12
Gcnt1	1.93402	322	129	300	139	1.34631	6.40978e-14
Gcsh	4.84649	650	302	528	254	1.08733	4.63004e-22
Gem	1.15937	45	18	69	25	1.60192	0.00196129
Gfod2	1.17941	107	73	121	52	1.05784	0.0230849
Gfra1	1.31048	24	52	10	25	-1.00487	0.0300694
Ghdc	0.279024	23	3	34	10	2.89081	0.00108187
Ghr	2.69783	380	70	245	60	2.33646	1.04284e-26
Gja1	5.70098	515	1316	464	974	-1.2172	7.52435e-41
Gja4	1.64794	3	45	6	36	-2.88819	8.70425e-06
Gjb4	1.60365	81	44	61	27	1.16112	0.00325479
Glipr1	2.61439	69	167	20	64	-1.35689	5.00928e-06
Glra1	-1.35987	19	1	20	3	4.48454	0.00118723
Glrb	-0.242519	39	8	59	8	3.62435	1.6447e-05
Glrx	3.48562	100	25	101	36	1.79588	9.54115e-08
Glrx3	5.05216	519	132	455	93	2.18196	6.03047e-54
Gm10036	1.7972	40	11	31	3	2.95122	0.000150428
Gm10047	-1.87282	21	0	16	0	5.04689	8.47245e-05
Gm10053	-3.70829	0	42	0	32	-1.49348	2.03685e-09
Gm10073	0.972203	764	0	783	0	7.66245	1.28019e-228
Gm10094	4.25674	13	216	11	201	-4.04158	3.25358e-45
Gm10116	3.16181	210	1	194	1	8.72827	1.21617e-55
Gm10119	4.13095	677	1	651	1	9.92333	3.74188e-192
Gm10146	3.47629	0	166	0	121	-10.116	8.56841e-36
Gm10250	4.23776	49	0	90	0	10.8791	2.05328e-14
Gm10288	4.99736	207	0	172	0	11.627	4.81827e-51
Gm10736	6.36793	364	179	402	182	1.06788	9.07248e-15
Gm10855	-0.959699	28	0	50	0	5.86873	2.93378e-08
Gm11273	3.61455	380	64	428	0	6.29229	1.46984e-54
Gm11808	2.24924	37	0	35	0	8.93009	3.34913e-10
Gm12166	2.44877	40	20	45	24	1.04441	0.0445516
Gm12184	2.34067	0	114	0	98	-8.94736	6.21525e-29
Gm12355	2.22985	3	14	2	19	-2.54234	0.0219711
Gm16380	1.6791	22	5	19	6	2.08518	0.02672
Gm16477	1.62835	26	0	22	1	7.14616	1.69687e-05
Gm1840	2.98608	170	2	183	4	6.64068	7.55947e-47
Gm20459	3.21637	45	6	55	10	2.7785	1.12808e-07
Gm3150	3.34324	0	136	0	147	-9.96753	2.80841e-40
Gm4737	3.27726	5	243	11	220	-4.62497	1.71292e-50
Gm4885	3.47619	14	137	30	123	-2.55902	8.10187e-14
Gm4924	-0.128913	41	20	40	19	1.55418	0.0301554
Gm5292	0.74734	0	29	0	34	-7.35152	1.54673e-08
Gm53	2.24865	98	0	81	0	8.92099	7.05722e-24
Gm5453	3.1896	88	0	90	0	9.85253	7.43657e-26
Gm5465	-0.714881	36	2	26	0	5.35318	1.30866e-07
Gm5506	2.04052	205	1549	170	1505	-2.78402	2.70618e-253
Gm5551	1.52433	34	5	36	5	3.12692	9.83054e-06
Gm5806	0.409371	91	0	78	0	7.12618	5.42772e-23
Gm5879	0.38685	65	2	65	1	6.19915	2.06696e-16
Gm5884	2.12845	6	48	21	39	-1.7434	0.0424649
Gm5908	4.67609	288	0	321	0	11.3191	8.75387e-86
Gm6158	3.2331	192	38	106	8	3.26108	4.50795e-22
Gm6169	3.35824	272	0	328	0	10.009	5.5302e-81
Gm6457	3.12829	32	72	33	215	-1.8362	0.000274483
Gm6724	0.613234	1	26	1	50	-4.29698	1.41063e-06
Gm6736	1.90846	42	11	30	11	1.8416	0.00827759
Gm6756	-4.5756	74	0	67	0	2.95752	9.83374e-20
Gm6984	0.91864	7	38	7	28	-1.87968	0.00115358
Gm7120	1.7275	105	36	92	39	1.53309	1.25549e-05
Gm7204	0.697485	1	50	1	39	-4.38361	3.4316e-10
Gm7292	2.49219	24	0	24	0	9.1794	8.17855e-07
Gm7334	1.83319	6	65	5	60	-3.16069	3.25902e-12
Gm7536	6.60275	2	1555	3	1342	-8.79046	0
Gm7964	4.78857	0	64	0	229	-11.4313	7.5493e-19
Gm8730	6.71635	2332	289	2814	299	3.06816	0
Gm8894	1.70446	10	123	1	76	-4.45325	7.7193e-21
Gm8910	4.86868	107	34	82	26	1.67252	2.25128e-07
Gm9000	5.43124	361	693	279	684	-1.11263	7.25339e-24
Gm9104	1.27678	0	38	0	44	-7.88146	3.662e-11
Gm9234	1.26057	51	8	55	4	3.76284	3.53531e-08
Gm9755	2.45863	11	144	8	115	-3.497	1.82725e-24
Gm9762	4.85345	18	0	19	0	11.4884	3.25653e-05
Gmds	4.03885	51	113	61	124	-1.03436	1.67336e-05
Gmeb1	2.03973	308	160	309	147	1.12948	3.63078e-11
Gng10	5.38621	22	7	24	4	2.15577	0.0148372
Gng11	2.56529	25	3	35	0	6.09927	7.436e-05
Gng12	3.86992	985	446	841	384	1.1836	1.24656e-38
Gng5	5.85967	134	335	160	326	-1.17501	2.25695e-13
Gnpda1	2.30862	40	18	51	17	1.47536	0.0100647
Gnpnat1	3.03523	38	88	50	101	-1.01058	0.000131648
Golga7	3.89419	162	70	169	84	1.15967	3.5524e-07
Gpc2	-0.247423	22	1	17	1	5.45395	0.000368455
Gpr137b	1.58927	0	66	0	69	-8.18818	2.14894e-19
Gpr153	3.12225	537	107	761	143	2.43942	1.57722e-68
Gpr30	0.793157	19	72	22	70	-1.47634	1.8397e-06
Gps2	3.18073	142	23	116	7	3.51237	3.02885e-21
Gpx7	0.520088	44	0	49	0	7.21451	6.35036e-13
Grb10	7.2006	1926	10	1980	10	7.64953	0
Grb2	1.8173	44	2	38	0	6.63335	1.79115e-10
Gsta4	2.3752	86	14	91	6	3.54168	4.54547e-13
Gstm5	3.72216	101	33	109	44	1.5112	5.37486e-07
Gsto1	6.8052	793	2237	627	1753	-1.52169	6.54672e-121
Gstz1	4.65217	131	523	172	511	-1.75132	7.81499e-39
Gtpbp3	1.40489	71	33	79	38	1.22915	0.000998991
Gypc	3.76892	572	272	654	308	1.12896	2.07899e-24
H2-M3	-0.0591073	11	37	10	45	-1.43777	0.000535824
H2afj	2.73442	209	47	264	60	2.25704	1.29687e-24
H2afx	7.06249	1860	278	1782	326	2.50798	2.09043e-240
H6pd	3.62569	148	63	177	67	1.36541	1.84084e-08
Hadhb	2.01748	96	243	120	324	-1.25067	4.56392e-15
Hagh	2.48548	107	17	73	17	2.51957	8.03842e-09
Haus2	2.1662	4	243	3	230	-5.30299	5.25511e-63
Hdac1	5.07615	1631	509	1343	548	1.48721	1.79725e-75
Hdac11	0.334407	11	40	8	94	-2.17561	0.000148601
Hddc3	3.07208	26	65	29	67	-1.17328	0.000446642
Hebp1	2.14407	83	22	92	17	2.33477	6.72982e-09
Hebp2	1.51363	2	173	4	163	-4.8411	4.28843e-42
Heg1	1.38835	189	574	251	775	-1.42507	8.61888e-45
Herpud1	4.47331	174	0	255	1	10.075	1.22351e-51
Hey2	0.853783	94	41	71	24	1.66656	2.14287e-05
Hhipl1	-0.00188394	42	4	41	12	3.42798	0.000208355
Hist1h1c	7.10514	1898	794	1726	669	1.26455	8.38669e-102
Hist1h2ab	7.86272	2251	118	1748	114	4.11112	0
Hist1h2ac	4.31482	101	39	71	41	1.12338	0.0109057
Hist1h2ae	4.389	0	108	0	55	-11.0414	3.46628e-16
Hist1h2ag	5.39879	52	0	37	0	12.0266	7.09085e-11
Hist1h2ah	5.56049	224	43	211	48	2.28026	1.30833e-24
Hist1h2al	6.89664	357	2	325	3	7.1162	5.06104e-91
Hist1h2an	5.31056	560	212	403	179	1.29847	5.70531e-20
Hist1h2bb	8.59192	2098	48	1860	47	5.35916	0
Hist1h2bc	6.9477	96	14	54	8	2.68321	7.09668e-09
Hist1h2be	4.28543	27	76	23	73	-1.53512	5.52207e-06
Hist1h2bf	6.85249	181	78	171	49	1.45046	6.04847e-10
Hist1h2bh	7.46285	12	32	9	28	-1.63804	0.0114541
Hist1h2bj	5.83547	492	10	357	5	5.98071	2.78438e-97
Hist1h2bk	7.28442	426	41	286	20	3.54829	3.09659e-60
Hist1h2bn	5.14845	787	1721	643	1542	-1.17517	5.36845e-78
Hist1h2bp	5.31518	51	544	33	458	-3.56952	2.06849e-95
Hist1h3a	5.95841	650	16	583	14	5.38358	1.10208e-150
Hist1h3b	7.01539	1378	230	1258	223	2.45833	1.58267e-173
Hist1h3c	6.40127	497	165	482	160	1.54604	2.61996e-37
Hist1h3e	7.00554	9	25	10	28	-1.52604	0.0237684
Hist1h3f	6.98492	175	2	155	1	6.8526	4.49825e-44
Hist1h4a	7.47826	16	98	11	169	-3.37354	8.72265e-15
Hist1h4b	7.75528	1520	383	1381	317	1.95875	1.86491e-156
Hist1h4d	10.3562	71	2	53	3	4.41944	4.25417e-12
Hist1h4h	9.47786	0	237	1	241	-12.2686	1.43855e-69
Hist1h4i	8.27793	288	2003	255	1595	-2.76416	7.98595e-235
Hist1h4j	7.81046	921	134	808	127	2.64543	2.05762e-120
Hist1h4k	5.93703	0	24	0	24	-12.6081	8.17855e-07
Hist2h2bb	8.58694	4231	4	4185	4	10.2232	0
Hist2h3b	7.7325	850	4	776	0	11.0355	3.1677e-232
Hist2h4	5.90269	970	4	760	2	8.79769	1.44996e-222
Hist4h4	7.87671	1840	16	1623	5	7.66969	0
Hmbs	4.56998	897	167	968	139	2.6425	8.24191e-120
Hmga1	3.85051	580	173	367	118	1.75043	9.23489e-30
Hmga1-rs1	4.96447	456	2	275	18	6.01895	5.08281e-59
Hmgn2	5.80427	572	430	882	263	1.06884	2.35749e-05
Hnf1b	-0.495167	1	16	0	41	-4.44508	0.000645849
Hnrnpa3	3.5836	96	40	181	72	1.35688	5.47466e-06
Hnrnpf	4.76643	942	89	945	91	3.43485	5.22418e-178
Hnrnpk	7.19901	707	131	651	182	2.02549	2.27083e-61
Hnrnpl	4.43602	155	462	135	470	-1.65135	2.50013e-35
Hoga1	-0.0514031	1	22	1	35	-3.71526	1.68946e-05
Hook2	0.611274	59	36	72	42	1.0179	0.045769
Hoxb5	1.13183	24	1	39	3	4.92614	4.92537e-06
Hoxb6	2.85442	69	2	91	1	6.77388	1.43312e-17
Hoxb7	1.5892	126	10	121	13	3.85066	3.23333e-22
Hoxb9	5.39311	864	9	941	15	6.44249	1.71195e-240
Hspa12b	-1.22078	28	1	42	2	4.86099	3.96293e-07
Hspb8	3.4152	24	169	16	162	-2.97408	4.56643e-27
Hyal2	4.23225	338	125	342	102	1.63216	8.4679e-23
Hyou1	5.44633	1970	151	2175	172	3.72612	0
Id4	1.86979	2	22	2	13	-2.78563	0.0134251
Idi1	2.14181	12	61	13	75	-2.25384	1.92224e-08
Ifi44	-1.14462	50	1	39	5	4.80608	4.93263e-07
Ifi47	-0.371334	18	0	17	0	6.4055	6.26801e-05
Ifit2	1.64356	121	13	161	21	3.40406	3.23333e-22
Ifrd2	4.10904	120	50	117	28	1.71744	2.88049e-07
Ift46	4.29	285	98	315	112	1.55612	2.3197e-21
Ift74	3.43925	304	82	273	111	1.65606	4.51095e-16
Igf2r	3.33796	414	6	483	3	7.81767	1.59486e-112
Il1rap	3.31028	137	802	165	881	-2.41322	1.60532e-113
Il20ra	-1.32585	0	22	1	24	-4.026	6.33997e-06
Il20rb	-1.20752	32	12	33	9	2.8601	0.0075448
Inadl	0.22215	130	67	169	82	1.36431	2.4552e-05
Inpp4b	-0.370291	12	106	10	115	-2.46168	4.05222e-19
Insig1	4.94008	365	137	596	270	1.30065	5.10833e-24
Irgm1	3.86674	1116	75	1009	96	3.73404	5.56238e-191
Isyna1	3.64243	36	16	39	13	1.43688	0.0146747
Itgb3bp	2.62126	61	18	64	21	1.76677	1.36804e-05
Itpr1	1.76232	267	614	290	622	-1.01622	1.40831e-27
Jund	5.40229	145	8	180	15	3.89286	1.22977e-32
Kcna4	-0.640843	0	23	0	21	-5.84005	3.80608e-06
Kcnip1	-0.625981	15	2	47	4	4.73479	0.00472226
Kdelr1	6.2268	92	203	107	235	-1.1468	4.33195e-10
Kdm6b	-0.054694	13	3	28	9	2.40605	0.0375595
Khdrbs1	4.85226	374	130	405	158	1.43672	4.92182e-25
Khk	1.07093	23	58	24	75	-1.25955	0.000315408
Kifc1	2.61184	146	59	182	52	1.64437	4.52789e-09
Kifc5b	1.60005	85	33	106	23	2.00028	5.78918e-06
Klhl22	2.82058	192	437	201	454	-1.09544	6.57653e-22
Klra6	0.389292	0	74	0	38	-6.95483	3.61335e-11
Kpna2	5.36461	1046	686	1563	526	1.09861	3.16408e-17
Kri1	-0.0778087	38	18	58	24	1.64638	0.0185648
Krt19	1.42173	55	13	40	6	2.71947	1.93522e-06
Lace1	-0.365128	22	0	32	1	6.15205	1.62104e-06
Lamtor3	3.80226	99	243	96	252	-1.29464	2.38956e-14
Lass4	0.846628	23	105	14	146	-2.39668	5.63905e-13
Ldb1	4.54545	500	175	526	209	1.44839	2.33561e-31
Leprel2	2.80586	300	114	324	100	1.62453	1.5491e-19
Lgals1	11.0284	222	98	192	76	1.06187	2.1451e-11
Lgals3bp	1.6006	12	71	18	88	-2.16529	1.2847e-10
Lgals9	1.30673	40	12	63	18	2.00415	0.000317642
Lhx1	2.01122	8	121	19	154	-3.12722	6.15464e-26
Lipt2	1.38592	38	97	41	89	-1.07634	8.43757e-05
Lman1	4.92539	856	1743	938	1918	-1.02562	9.74509e-68
Lmo7	2.87919	463	1070	639	1490	-1.11954	2.69218e-54
Loxl2	3.72585	1904	74	1521	62	4.85788	0
Lrfn1	-1.07785	4	23	10	37	-1.2339	0.000940469
Lrp2	-0.16134	235	43	181	24	3.66495	5.47102e-30
Lrrc15	2.42087	124	597	78	428	-2.21743	2.65213e-58
Lrrc16a	0.805245	61	234	88	258	-1.43959	1.19997e-19
Lrrc17	6.06307	1656	597	1602	954	1.09883	7.92099e-37
Lsm5	1.76773	10	38	6	26	-1.78874	0.00133005
Lsm7	4.72604	25	131	20	146	-2.60312	1.02381e-17
Ly6e	4.26118	486	38	467	43	3.59914	1.09091e-89
Lyrm7	0.743467	8	41	13	65	-1.9533	6.16438e-06
M6pr	4.96777	1077	299	901	230	1.93185	7.65865e-93
Manba	-1.28641	5	58	16	33	-1.01378	0.0340403
Manf	6.47658	446	27	508	55	3.57929	1.71527e-91
Map3k6	-0.97715	3	40	5	41	-2.16559	1.73371e-07
Map4k2	0.310175	76	39	112	73	1.13502	0.0107373
Mapk8ip3	2.31456	336	95	436	84	2.23436	1.29875e-31
Marcksl1	7.07772	1488	9	1401	7	7.52677	0
Mcart1	3.52018	10	39	6	44	-2.35553	0.000102342
Mcee	1.75012	10	31	11	27	-1.3005	0.025551
Mecom	1.57158	240	28	302	10	4.86175	4.40387e-42
Mecr	3.05368	54	32	56	21	1.17692	0.0365319
Melk	4.13032	866	406	796	393	1.10909	5.56862e-31
Mest	4.39692	0	478	1	590	-9.73011	9.11263e-143
Mex3d	3.54176	148	470	160	429	-1.47376	2.32732e-28
Mfap2	3.03182	113	7	152	4	5.03545	8.53737e-25
Mgmt	2.28375	3	30	0	42	-6.0361	4.44923e-06
Mgst2	2.34559	6	77	11	108	-3.19206	5.24591e-16
Mif4gd	1.94969	83	13	94	12	3.06669	6.49935e-13
Mks1	-1.15289	0	17	1	26	-4.2177	4.40693e-05
Mlf2	6.97264	67	15	73	24	1.80483	2.12879e-06
Mllt3	3.3393	728	241	823	278	1.64817	3.12932e-56
Morf4l1	3.82721	98	261	93	289	-1.471	2.09174e-17
Morn4	0.503576	9	32	9	28	-1.35984	0.00587989
Mospd3	2.57133	85	302	103	313	-1.62127	9.23858e-25
Mpp7	0.559567	67	17	60	33	1.75447	0.0122303
Mpv17	1.38828	149	63	172	54	1.64506	1.31569e-08
Mpzl3	-0.927697	7	24	5	36	-1.43873	0.00648041
Mrpl23	1.32147	7	86	5	61	-3.14247	1.40696e-12
Mrpl50	3.6618	242	84	188	75	1.49029	1.16927e-11
Mrps18b	3.89915	17	82	16	74	-2.17321	2.01939e-09
Mrps21	4.64047	47	4	36	5	3.22209	2.55877e-06
Mrps26	4.42427	20	58	23	48	-1.26172	0.00780765
Mrps33	2.96333	16	60	10	73	-2.27703	1.30559e-06
Mrps34	3.58938	114	0	105	1	9.17125	2.61999e-29
Mrps7	4.36701	209	5	213	2	6.45693	4.22646e-54
Mrrf	2.21124	132	47	129	59	1.41599	1.22161e-06
Mrto4	4.62664	423	233	347	159	1.01599	5.88642e-13
Msi1	1.18806	33	12	43	7	2.3447	0.00491848
Mt1	3.03318	106	0	99	4	7.39197	7.70331e-24
Mthfr	2.02137	343	176	431	219	1.08645	1.06354e-12
Mtrf1	-0.835956	22	0	25	0	5.96275	1.78619e-06
Mtrf1l	1.06575	43	11	52	13	2.26335	4.27575e-05
Mtus2	1.13371	42	225	61	367	-2.19192	2.03951e-30
Mycl1	1.01537	80	39	54	25	1.31077	0.00347521
Myl12a	7.98944	4122	1698	3641	1616	1.0707	2.82269e-174
Myl12b	4.73515	1008	119	1042	183	2.82423	1.01993e-144
Myo7a	0.618121	219	36	308	44	3.20566	3.79832e-32
Mysm1	1.86812	159	75	191	83	1.28368	1.54128e-07
Mzt1	4.01894	293	156	238	113	1.03828	5.51854e-10
Mzt2	3.16045	103	202	78	241	-1.21976	5.83071e-08
N6amt2	3.94974	101	50	103	54	1.02193	0.000375632
Naa20	4.58385	90	279	107	261	-1.42478	3.37382e-15
Nap1l1	5.31909	2101	123	2142	122	4.15247	0
Nat2	0.734559	30	2	14	2	3.98839	0.00797585
Nat9	1.05351	41	2	57	1	6.27099	9.626e-10
Ncaph2	4.6443	5	175	6	136	-4.72309	4.06212e-32
Ncoa4	0.88418	47	250	44	219	-2.01652	4.06236e-28
Ndn	3.15536	7	29	3	35	-2.68659	0.000730317
Ndufab1	4.04162	426	180	230	130	1.08345	5.30958e-07
Ndufb8	5.86124	107	947	94	936	-3.20661	4.42489e-167
Nebl	-1.62084	44	2	33	0	4.70345	1.17048e-09
Nek1	0.191987	55	28	72	40	1.31031	0.0131572
Nek3	0.228974	81	13	76	15	3.08356	2.55794e-10
Nek4	1.35626	204	92	195	90	1.29598	2.31446e-09
Nfyc	3.33815	407	67	311	67	2.46165	1.28336e-37
Nhp2l1	4.72659	380	18	348	15	4.55364	3.36304e-82
Nkx3-2	1.1347	7	98	7	96	-3.28112	3.97805e-20
Nol3	-1.3978	0	21	4	30	-3.29862	2.08292e-05
Nop16	3.17706	220	103	165	82	1.13054	4.91003e-07
Nox4	0.71133	210	63	178	42	2.2592	8.57117e-19
Npas3	-1.52335	4	16	4	21	-1.04284	0.0216395
Npdc1	2.71135	145	68	174	103	1.00026	6.49433e-05
Npm1	5.16854	515	233	582	283	1.1032	1.35409e-23
Npm3	4.50333	321	130	337	189	1.09306	5.03152e-10
Npnt	3.32657	217	522	250	519	-1.08362	1.2259e-21
Nprl2	2.64576	106	9	112	16	3.35961	4.29671e-18
Nqo1	3.61328	299	125	216	75	1.46011	4.3208e-16
Nr1d1	2.21291	55	21	38	9	1.88678	0.000356993
Nr2f6	3.9765	337	37	265	24	3.38615	2.23702e-51
Nsg1	5.31904	119	355	260	615	-1.39178	2.46815e-27
Ntn1	1.7431	119	53	196	98	1.21807	1.79171e-06
Ntpcr	0.976922	57	17	61	35	1.48264	0.0180696
Nudt8	2.22988	53	18	72	22	1.75981	0.000103712
Nup54	4.42869	394	173	436	172	1.30307	5.77173e-20
Ocel1	0.730696	73	6	64	13	3.48311	1.23012e-08
Odc1	5.95273	1008	237	1059	200	2.24319	5.3986e-112
Oma1	1.31354	80	42	81	28	1.4196	0.00162704
ORF63	2.00412	16	73	13	105	-2.40101	3.10723e-09
Osbpl6	0.750988	52	218	75	248	-1.55943	7.16244e-22
Ost4	6.75701	92	2	119	7	4.76625	3.92278e-24
Ostf1	2.76444	258	136	235	107	1.11033	3.4571e-09
Otud3	0.475729	25	9	25	7	2.03443	0.0192472
Pabpc4	4.04513	87	229	60	278	-1.74853	4.12283e-15
Palmd	-0.868119	16	4	25	10	2.65851	0.0439768
Pank4	3.1875	60	33	81	35	1.11457	0.0122632
Papd4	4.44433	225	459	211	446	-1.02231	1.75371e-18
Parp8	3.68544	293	153	310	155	1.03261	1.55624e-10
Pars2	0.286976	117	60	100	54	1.28375	0.000665424
Pax8	3.92653	2	611	5	731	-6.90881	5.20992e-178
Pcdh9	0.0808628	43	12	40	10	2.51543	0.000148363
Pcdha3	-2.00112	0	17	0	21	-4.20814	4.5495e-05
Pcdha4	-0.782574	2	45	3	50	-2.9614	1.03555e-10
Pcdhb22	0.934521	45	18	53	30	1.27622	0.0267018
Pcna	6.73212	1224	568	1235	584	1.06291	2.13254e-52
Pcnp	4.10118	208	625	222	526	-1.36804	2.55913e-28
Pcolce2	2.72191	92	250	55	170	-1.42771	4.24197e-14
Pcsk6	-0.126783	20	77	21	58	-1.19799	0.000100081
Pdap1	4.96738	819	81	821	80	3.38101	9.20319e-153
Pdcd10	2.89028	351	94	204	121	1.39772	1.44497e-05
Pde3a	0.581296	23	91	24	90	-1.57416	1.98242e-09
Pde3b	1.36997	85	24	75	19	2.13543	3.25802e-08
Pde4a	1.05124	150	35	170	44	2.30122	3.16408e-17
Pde8a	1.09263	93	27	104	21	2.33852	4.68803e-09
Pdgfd	0.0277378	18	70	7	53	-1.88568	8.25348e-08
Pdhb	4.68836	485	185	374	188	1.20452	1.96201e-14
Pdk4	-0.442223	53	6	31	2	4.66533	4.6134e-07
Pdpn	3.03412	12	224	7	238	-4.34138	1.28559e-50
Pdrg1	3.15235	136	62	118	61	1.13066	6.73384e-05
Pdxdc1	4.19654	1069	495	1167	519	1.19644	1.65599e-47
Pdzrn3	3.69564	413	1050	434	1096	-1.28716	6.72511e-63
Pebp1	5.67391	752	194	808	158	2.16366	8.1754e-77
Peg10	5.05083	8	2729	27	3667	-7.22328	0
Peg3	1.96138	2	296	0	511	-7.13351	3.77335e-84
Per3	0.906931	311	95	236	65	2.07928	4.93288e-23
Pes1	3.01291	160	53	167	84	1.36655	6.15585e-07
Pex26	-0.119447	62	34	73	46	1.21102	0.03556
Pgam1	5.127	145	885	101	818	-2.79039	1.43409e-128
Pgcp	1.319	65	1	77	0	7.32372	1.20679e-17
Phyhip	-0.210576	27	0	26	1	6.23586	1.45763e-06
Pik3cd	0.759722	183	106	208	119	1.04753	2.29886e-05
Pik3r2	3.67026	306	116	320	124	1.42936	8.993e-20
Pla2g4b	0.433854	8	28	4	26	-1.82221	0.00264528
Plagl1	1.90659	12	351	13	375	-4.29039	2.21224e-86
Plau	5.09202	240	534	174	377	-1.1422	2.08297e-17
Plekhg2	2.46331	97	35	94	54	1.20776	0.00267442
Plekhg5	1.41259	149	68	178	86	1.23822	2.00934e-07
Plekhn1	0.137744	35	18	50	22	1.48464	0.0437562
Plin3	3.13074	356	1	398	0	9.19934	6.72265e-104
Plod1	4.14061	853	257	912	262	1.80385	8.26562e-74
Plscr2	2.23177	19	186	14	245	-3.39699	1.39173e-34
Plxdc2	2.75278	186	720	211	926	-1.93144	1.77944e-73
Pmvk	2.85287	161	52	258	78	1.75421	2.02997e-13
Pnpo	1.61191	121	65	141	48	1.38996	0.00012815
Poc1b	1.25619	198	125	244	113	1.05376	0.000150239
Pole3	4.00901	37	1	25	0	8.00296	2.17949e-07
Pole4	2.79212	242	34	256	27	3.19403	9.02823e-39
Polr1e	0.830488	23	122	12	138	-2.51878	1.11271e-16
Polr2i	4.35178	21	42	26	55	-1.00955	0.0217963
Polr2k	2.91145	16	62	16	99	-2.17448	5.29514e-07
Pon2	2.26256	185	8	185	4	5.88005	8.95125e-44
Pop4	4.3163	198	557	162	449	-1.43428	4.15145e-31
Postn	3.37629	853	359	493	138	1.60837	1.25824e-45
Pot1a	1.97244	236	121	220	105	1.13581	5.56607e-09
Ppap2a	4.59152	243	558	275	726	-1.27826	2.41499e-28
Ppbp	5.6982	555	317	1208	461	1.07191	3.9927e-15
Ppcdc	1.05913	101	54	131	75	1.02918	0.000735294
Ppia	8.93949	354	93	267	76	1.71097	4.44429e-25
Ppp1r10	4.19571	78	18	83	9	2.7148	1.95424e-09
Ppp1r2	3.29279	6	75	11	54	-2.85245	2.19186e-07
Prdx2	6.4847	2302	871	2217	887	1.33699	2.41801e-128
Prelid1	7.65976	654	190	642	190	1.65597	7.17667e-57
Prep	3.54085	183	433	223	467	-1.08984	6.37025e-20
Prkar1b	-0.759407	19	3	18	5	3.52836	0.0197433
Prkar2b	3.09784	539	257	578	242	1.24376	6.31239e-23
Prkcdbp	5.49046	23	71	13	80	-2.09124	2.37809e-06
Prom1	1.70164	0	308	0	320	-8.29457	9.11725e-92
Pros1	3.26803	87	255	101	313	-1.50789	2.00538e-19
Prpf38a	4.59677	133	53	81	49	1.04343	0.011634
Prpf8	6.57815	486	1	451	2	8.61887	2.86042e-130
Prss46	0.892252	43	14	35	16	1.63792	0.0192264
Psd3	0.480325	230	50	353	73	2.65443	8.95351e-28
Psd4	-1.13682	9	55	14	79	-1.49001	1.43256e-08
Psenen	3.69535	33	142	33	140	-2.02469	5.85619e-16
Psma3	5.23782	397	2132	487	1881	-2.15343	1.57357e-190
Psma4	6.50805	508	186	352	160	1.26282	8.42793e-17
Psmb5	4.67004	293	89	378	90	1.92103	1.46997e-25
Psmd11	5.67501	671	234	519	319	1.09786	2.48602e-11
Psrc1	2.37791	283	69	363	109	2.01031	7.68641e-31
Pstpip2	0.142767	28	8	30	7	2.52862	0.00290473
Pter	0.366499	87	26	99	17	2.69644	2.80725e-08
Ptgr1	3.57751	180	466	170	401	-1.24663	1.2664e-21
Ptgs1	2.33954	30	130	30	123	-1.93352	8.36655e-14
Ptn	4.70764	121	339	122	422	-1.61174	4.92032e-24
Ptpla	3.98749	71	13	57	7	2.80111	6.9838e-10
Ptprd	-0.785137	74	14	60	10	3.74548	3.64179e-09
Ptprf	2.8487	538	195	630	230	1.54012	6.71945e-37
Ptprz1	2.62838	513	175	369	144	1.54734	6.95317e-23
Pts	2.48548	26	0	20	1	7.04011	5.78444e-05
Ptx3	7.17922	528	2502	877	3695	-2.20324	1.88428e-303
Qdpr	3.35958	92	43	120	68	1.02868	0.000509821
Rab11fip1	-0.458909	57	31	71	45	1.30071	0.042298
Rab27a	-1.25593	1	18	4	21	-1.81631	0.00212227
Rab27b	2.8088	260	136	299	150	1.04266	2.03315e-09
Rab28	4.36744	93	244	86	276	-1.4928	5.70865e-16
Rab3d	1.19044	83	42	120	57	1.19691	0.000730001
Rad23b	6.34551	4105	2054	3609	1644	1.03616	1.10941e-151
Radil	0.106859	28	61	26	96	-1.08123	0.00135777
Raet1c	-0.577703	3	16	0	23	-3.77153	0.00840363
Ran	7.07245	93	2824	109	2606	-4.79668	0
Rangrf	1.15048	44	1	21	0	6.91876	3.07224e-06
Rap1a	3.97116	41	214	41	186	-2.21656	2.39716e-22
Rapgefl1	-1.02733	37	17	65	20	2.44847	0.0160847
Rasa1	4.66691	243	574	258	511	-1.0897	3.29848e-19
Rasgef1b	-0.152408	9	28	21	55	-1.01821	0.00531321
Rassf2	1.63366	39	230	125	463	-1.95877	4.26945e-33
Rbm12b	0.274292	82	20	68	22	2.33445	3.98178e-06
Rbm15b	5.08351	1194	134	1022	104	3.25905	2.05101e-188
Rbm6	3.22501	165	75	179	103	1.04949	2.06906e-05
Rbmxl1	4.12316	36	12	45	14	1.68088	0.00171067
Rbp1	-1.05508	1	24	1	17	-2.76104	0.000359007
Rell1	3.71404	134	272	154	345	-1.04222	3.31104e-11
Rest	3.92457	572	1075	510	1247	-1.04699	1.23307e-34
Retsat	3.4225	37	201	50	197	-2.13919	6.14822e-21
Rfk	4.50895	179	361	173	561	-1.33299	2.14835e-14
Rgl3	0.340474	75	0	113	5	6.3942	4.17984e-22
Rgs17	0.0802095	21	75	12	75	-1.72322	1.02223e-07
Rhot2	2.37901	133	38	126	34	1.9754	1.45644e-12
Rilpl2	3.17375	33	71	41	92	-1.05296	0.00061032
Ripk3	1.70269	45	7	42	9	2.70987	1.05507e-05
Rlf	3.08511	234	121	219	116	1.02449	8.25745e-08
Rmnd1	1.45914	197	90	196	98	1.22326	4.50445e-08
Rnf24	2.25813	193	668	174	677	-1.72779	9.36895e-61
Rnf26	3.63704	1	18	3	24	-3.46584	0.00031236
Rnf43	0.672908	58	164	29	191	-1.73768	3.45449e-12
Robo2	0.434032	24	89	41	91	-1.14564	4.5115e-05
Ror2	1.65983	261	126	276	150	1.09407	4.50704e-09
Rp9	3.07846	243	89	240	91	1.49892	8.33823e-16
Rpl10a	7.84903	964	1632	820	1832	-1.09695	1.65927e-38
Rpl11	8.06159	2956	946	2928	850	1.69466	2.76055e-236
Rpl15	6.44659	1694	174	1386	166	3.16078	5.47359e-238
Rpl17-ps3	2.05208	0	62	0	96	-8.64954	2.9406e-18
Rpl18	8.33807	174	54	191	62	1.59068	5.00531e-15
Rpl18a	7.25293	129	624	130	665	-2.40023	2.42911e-77
Rpl19	9.02619	1451	5119	1536	5479	-1.90257	0
Rpl22l1	6.34268	58	1	77	0	9.37948	1.27256e-15
Rpl23a	9.26044	262	8	319	10	5.0133	1.18766e-65
Rpl23a-ps3	2.98401	73	0	77	0	9.6496	1.7295e-21
Rpl26	8.76106	800	1673	816	1682	-1.1921	3.21293e-67
Rpl27	6.09257	334	1106	300	1147	-1.83406	3.04505e-95
Rpl27a	7.10328	312	853	248	843	-1.69847	2.60676e-57
Rpl34	7.85264	96	1522	104	1437	-3.89948	2.50409e-298
Rpl35a	7.19808	1681	427	1494	410	1.80936	8.81024e-143
Rpl36	8.91532	664	1607	641	1619	-1.43921	3.13399e-88
Rpl36-ps3	4.72758	72	0	48	1	8.644	9.54408e-13
Rpl4	9.44835	3596	11793	3396	11254	-1.77422	0
Rpl41	10.3808	2736	361	2715	340	2.59436	0
Rpl5	6.48663	545	1213	470	1195	-1.26326	3.51037e-57
Rpl9	8.65571	568	1530	481	1494	-1.64754	5.7366e-100
Rpl9-ps6	4.47927	0	560	0	489	-11.1456	4.62609e-146
Rps10	7.47564	229	894	165	829	-2.23418	7.93137e-92
Rps13-ps1	4.55598	344	1	311	0	10.1579	1.16921e-92
Rps15	8.8531	69	2	94	8	4.35695	1.49342e-17
Rps17	8.8265	125	212	80	199	-1.23729	7.69866e-06
Rps2	8.72516	14452	1295	13287	1876	3.08424	0
Rps26	10.3093	2697	426	2653	337	2.42768	0
Rps26-ps1	5.80921	580	0	874	13	9.29154	2.26372e-173
Rps29	7.66671	17	389	164	315	-2.82313	2.42108e-11
Rpsa	8.52409	3709	1465	3699	1538	1.17949	6.60069e-200
Rpsa-ps10	6.50891	5	3178	5	3799	-8.99695	0
Rrad	3.26689	53	203	73	245	-1.75947	5.99162e-21
Rsrc1	3.17226	130	305	123	310	-1.19063	1.7177e-16
Rtkn2	0.876324	70	28	99	33	1.71722	7.1776e-05
Rtp4	-1.08848	28	0	22	0	5.72435	1.62064e-06
Runx2	1.35901	58	23	71	22	1.70142	0.000315418
Ruvbl1	4.43781	111	373	144	306	-1.37194	9.457e-14
Rxra	3.7545	128	31	110	29	2.05049	1.34459e-11
S100a11	6.20143	764	122	801	159	2.47293	3.41715e-102
S100a3	0.361558	14	1	16	1	5.21963	0.00264331
Sap18	3.17608	116	383	125	386	-1.58711	5.52904e-31
Sarnp	3.56392	184	33	144	29	2.46155	1.08164e-18
Scarb1	4.61624	239	539	292	613	-1.10185	7.01816e-26
Scoc	3.59407	163	58	151	68	1.37481	7.89532e-08
Scp2	2.31177	113	58	127	60	1.11998	8.71718e-05
Sdhd	5.66142	639	203	558	182	1.64622	4.33463e-44
Sdk1	-0.510483	0	30	0	110	-5.97414	7.69584e-09
Sdk2	-2.2614	0	49	1	80	-3.12294	2.05328e-14
Sec61g	4.4355	81	561	190	727	-2.30753	2.39581e-73
Selk	4.87111	92	213	121	212	-1.00564	2.29903e-06
Sema3a	4.19173	1790	575	1241	511	1.49259	1.00874e-68
Sema3d	0.768946	25	102	59	132	-1.28149	4.7363e-07
Sema4f	-1.49369	16	0	20	0	5.37771	8.70567e-05
Sema5a	-0.875655	97	0	132	1	5.87767	1.2378e-28
Senp5	3.44068	161	2	131	2	6.81298	1.84178e-35
Serf2	4.18394	143	510	151	510	-1.7509	2.73598e-45
Serpinb1a	2.19281	44	17	84	26	1.65781	0.00160311
Sertad1	3.74487	93	9	82	5	3.80884	1.00762e-17
Sertad3	2.44753	83	43	91	37	1.20904	0.00106137
Sfmbt2	-0.0734483	104	72	90	40	1.34867	0.0311902
Sgce	3.95156	1	256	0	310	-8.77634	4.41668e-74
Shc1	3.87103	41	0	41	2	7.49653	9.65738e-10
Sik3	3.17591	297	144	350	145	1.23963	1.41029e-12
Slc1a5	3.76092	117	870	140	900	-2.7227	6.7924e-135
Slc22a17	-1.73528	0	18	0	35	-4.51895	2.21986e-05
Slc27a6	1.75752	7	114	6	96	-3.56518	4.32048e-21
Slc2a10	0.331167	4	88	2	112	-4.07673	8.80223e-21
Slc35a4	4.92926	86	0	83	0	11.5603	2.03706e-24
Slc35b2	3.88203	56	12	54	10	2.39034	2.94269e-07
Slc35d2	-0.653043	33	5	44	4	4.57573	1.28448e-05
Slc37a4	0.923058	108	6	127	16	4.21669	9.73926e-22
Slc41a3	0.618431	8	21	12	39	-1.22165	0.0382694
Slc44a1	3.94242	227	106	300	155	1.07966	1.85061e-10
Slc4a8	1.17264	231	50	230	83	2.09301	2.52181e-16
Slc52a2	2.08429	116	49	87	51	1.12103	0.00544391
Slc9a3r1	3.82312	209	97	230	116	1.09652	4.32058e-09
Slco4a1	1.86555	127	1	157	6	6.53545	8.66222e-36
Slit3	-0.195756	3	59	11	96	-2.60444	9.70667e-14
Slu7	1.74956	84	220	106	225	-1.09546	2.55829e-10
Smox	0.114591	5	48	12	52	-2.06768	1.53608e-06
Snph	-0.621482	1	97	1	108	-3.81849	5.94276e-27
Snrnp35	2.54481	31	94	37	70	-1.16219	0.00377447
Snrpc	6.00745	35	16	37	15	1.19782	0.0237848
Snrpd2	6.89084	514	173	428	198	1.29224	1.48235e-19
Snrpf	6.0665	4	812	6	579	-6.95009	3.73441e-161
Snrpg	6.84244	183	78	186	62	1.35168	3.13006e-10
Snrpn	2.4346	25	91	36	91	-1.49188	3.65471e-06
Socs2	1.33763	13	55	13	46	-1.72526	5.38773e-05
Sorcs1	-0.148172	46	145	41	217	-1.48799	2.04441e-12
Sord	2.02212	34	17	54	27	1.11252	0.0429372
Sort1	1.45238	249	87	277	132	1.4497	3.25902e-12
Spata1	-0.964366	21	8	22	7	2.57233	0.0489019
Spata6	1.67279	166	67	221	73	1.59496	3.26033e-10
Spock2	-1.33036	29	4	62	12	3.9875	3.1221e-05
Spr	3.95871	64	1	46	1	6.08021	3.57023e-12
Spr-ps1	-0.155118	0	19	0	19	-6.37325	2.21986e-05
Spsb3	2.48861	170	3	173	3	6.80004	2.20935e-45
Srfbp1	3.26365	283	107	291	109	1.48622	1.49549e-18
Srgap3	0.985354	171	61	213	83	1.66961	1.69558e-12
Srr	0.644908	31	123	44	127	-1.40583	7.0474e-10
Srsf10	4.45266	771	289	846	254	1.61709	5.12611e-50
St6gal1	3.64553	256	1069	245	909	-1.91033	9.38195e-89
St6galnac2	-0.588232	46	17	53	19	2.13288	0.000946498
Stard10	1.31275	18	1	18	0	6.29631	0.000213626
Stbd1	2.63528	97	51	76	34	1.12906	0.000638429
Stc2	0.0917847	52	12	64	26	2.14263	0.000196718
Stk19	2.01935	37	17	41	20	1.18882	0.0307953
Stmn1	5.99883	182	687	214	602	-1.71237	2.33118e-42
Strap	6.02477	222	0	194	4	9.18637	4.56691e-51
Stxbp2	1.74199	80	37	73	40	1.10861	0.00506883
Swi5	6.98487	94	1	65	2	5.70196	1.95749e-16
Sys1	3.3916	36	16	32	14	1.25644	0.0310967
Tacstd2	-1.07475	20	3	15	2	4.19737	0.00560438
Tada2b	2.49291	15	3	13	2	2.64957	0.0249428
Tasp1	1.05928	65	15	69	42	1.62889	0.0224045
Tbca	6.11219	383	181	462	208	1.08128	7.51052e-17
Tcirg1	2.84805	28	3	41	2	4.04582	1.39729e-05
Tcn2	-0.429918	29	1	46	2	5.43396	2.10662e-07
Tcof1	3.04803	330	894	485	1018	-1.15581	1.19121e-42
Tdg	2.81872	114	317	55	280	-1.80444	2.6743e-22
Tdrkh	1.22849	47	24	47	26	1.06155	0.042234
Tead4	1.25495	143	72	114	67	1.0332	0.00131786
Tert	-1.36877	39	0	36	1	5.33867	2.42094e-09
Tfpi	3.22923	16	131	18	134	-2.84061	4.24822e-22
Tgfbi	4.81445	951	264	1484	391	1.90567	5.12774e-90
Thap11	3.75648	32	15	34	13	1.2909	0.0346599
Thnsl1	0.435265	88	18	103	26	2.57457	3.86628e-11
Thy1	-0.228745	51	0	22	0	6.52368	1.59686e-06
Timm23	3.34229	23	237	25	200	-3.06496	4.76439e-34
Timm9	2.41147	48	106	36	100	-1.20687	1.04544e-05
Timp3	4.92843	1641	759	2212	897	1.22467	1.08598e-72
Tmc7	-0.339869	11	52	11	47	-1.50288	6.86084e-06
Tmem126a	4.81458	34	66	31	68	-1.02585	0.00416772
Tmem138	2.72893	143	66	139	45	1.46446	3.7719e-07
Tmem141	-0.100917	4	28	6	25	-1.82434	0.00194664
Tmem159	2.2928	39	80	35	88	-1.0832	0.000519927
Tmem17	1.01454	54	21	52	28	1.34122	0.0173023
Tmem171	1.19781	10	58	10	36	-1.90061	0.00038069
Tmem44	0.605777	230	120	219	143	1.06113	0.00019532
Tmem45a	1.31808	3	51	5	82	-3.52779	1.47948e-11
Tmem59	5.32535	462	208	607	248	1.22878	3.44833e-22
Tmem86a	1.00258	49	26	60	30	1.15336	0.0215168
Tmem90b	-0.227193	19	1	23	2	5.20641	0.000154372
Tmem97	5.34092	514	209	529	196	1.37277	1.61078e-29
Tmod2	0.914246	66	352	119	522	-1.92612	4.05994e-47
Tmsb10	8.9998	74	33	74	29	1.07251	0.000257739
Tmtc1	-1.16292	23	7	23	4	3.48286	0.0103067
Tmtc2	-1.89907	15	1	18	0	4.42979	0.00118351
Tmtc4	4.64995	29	164	41	268	-2.54769	3.76303e-23
Tnfrsf11b	5.06039	751	322	746	314	1.25288	5.95133e-39
Tnfrsf1b	0.526093	8	77	10	68	-2.47642	4.78179e-11
Tnip2	0.577431	64	31	66	42	1.13354	0.0424649
Tom1	-0.223511	4	55	6	63	-2.6377	1.09939e-11
Tomm20	4.20419	569	60	432	77	2.90318	9.99501e-60
Tomm40	4.05387	102	3	89	0	7.88005	1.16668e-25
Tox	2.71751	109	43	153	67	1.34876	3.28248e-07
Tpd52	2.58401	231	67	112	51	1.53406	6.27763e-06
Tpd52l1	1.45068	75	13	58	26	2.02574	0.00139425
Tpmt	2.67478	85	29	109	26	1.92207	5.14009e-07
Tprgl	4.60055	303	141	308	152	1.08111	1.62626e-12
Tprkb	3.42632	175	93	199	99	1.02591	2.06655e-06
Tpst1	3.20549	284	96	368	121	1.6533	8.45693e-22
Trim44	3.21296	723	315	767	319	1.3135	1.79686e-36
Trim6	-2.33871	5	18	1	24	-1.02801	0.0184861
Tsen2	1.89593	113	41	110	48	1.46649	2.897e-06
Tsg101	4.31554	207	471	156	445	-1.31205	1.18562e-23
Tspan18	2.22811	39	175	54	199	-1.86859	8.40663e-20
Tstd2	3.40869	427	227	394	200	1.01865	3.30394e-14
Ttc4	2.78443	280	127	258	134	1.11377	1.65588e-09
Tub	-1.05634	0	46	0	55	-5.35013	1.58677e-13
Tuba1a	8.47862	1206	67	1185	36	4.55143	5.07878e-269
Tuba1b	5.14759	1340	61	1328	84	4.25063	1.55131e-286
Tuba1c	6.15239	605	2930	563	3072	-2.39451	0
Tubb2a	4.30076	276	40	260	61	2.467	2.12083e-29
Tubb4b	7.11088	281	90	232	58	1.75765	4.57375e-23
Tufm	3.96253	131	421	135	350	-1.46954	3.80981e-22
Tuft1	1.72581	25	96	21	123	-2.0347	2.47279e-10
Tusc2	3.24184	47	0	30	1	7.6917	1.11961e-07
Txn1	7.87467	128	8	107	13	3.51968	1.03539e-18
Txndc12	5.01815	359	195	382	166	1.04084	1.5408e-11
U90926	3.32528	127	8	93	11	3.65401	1.58242e-16
Ube2e1	4.9606	18	106	27	107	-2.24359	9.38351e-12
Ube2j1	4.16483	871	397	719	376	1.08612	1.74503e-24
Ube2m	5.60205	35	1	28	0	8.60898	3.33525e-08
Ube2s	5.68711	44	1516	41	1061	-4.85076	2.20685e-255
Ubiad1	3.21653	237	87	266	106	1.46409	5.45923e-16
Ubl7	3.40514	42	109	51	96	-1.07146	0.000607765
Ublcp1	2.62556	46	115	50	121	-1.21143	3.87414e-07
Uchl1	3.60452	65	211	64	150	-1.39878	1.56101e-08
Uchl4	1.11923	16	1	36	7	3.62956	0.000665581
Uck1	2.03362	30	75	17	48	-1.27873	0.000401159
Ucp2	3.0491	627	4	637	0	8.86728	7.02488e-179
Ulk4	0.409252	36	168	49	191	-1.66789	5.04168e-20
Unc13b	-1.24827	8	44	6	40	-1.47318	2.34625e-06
Unc5c	2.49417	707	193	626	168	1.9899	1.36024e-61
Uqcrfs1	4.90592	123	53	140	44	1.44511	4.81992e-07
Uros	-0.2374	56	12	41	17	2.34876	0.00450805
Use1	3.69606	146	18	143	13	3.32296	3.86189e-25
Usp20	0.815849	44	11	49	19	1.97084	0.000847207
Usp25	3.01144	127	280	115	295	-1.15668	1.36416e-13
Vapa	6.34668	126	247	107	222	-1.01961	2.5291e-09
Vash1	0.0694485	61	28	59	35	1.34835	0.0291978
Vav3	-0.721916	50	5	39	6	4.33673	1.79952e-06
Vcam1	3.05896	209	100	295	155	1.06564	2.50704e-09
Vcp	5.61069	2707	713	2629	736	1.89074	1.61107e-245
Vdac3	5.4316	122	46	114	51	1.28328	3.34931e-06
Vegfc	2.87817	12	81	16	96	-2.52308	5.61975e-13
Vip	1.16621	38	8	19	0	4.79519	3.70346e-05
Vit	0.39537	76	2	56	3	6.02949	6.43459e-13
Vldlr	-0.683048	57	23	73	17	2.74946	0.000441746
Wbp11	4.84917	584	124	597	141	2.18917	2.50331e-66
Wdr54	0.31115	8	28	10	31	-1.3189	0.00524496
Wdr85	1.38212	106	50	121	44	1.44173	2.48893e-05
Wdyhv1	2.33393	46	21	52	30	1.04445	0.0362713
Wscd2	0.0474883	26	11	52	18	1.89318	0.0323943
Xkr5	-1.57216	2	23	0	33	-3.20185	5.38773e-05
Xrcc6bp1	1.66678	45	19	50	27	1.19199	0.0224045
Ywhaq	5.58048	17	55	20	193	-2.47188	2.35749e-05
Ywhaz	6.60136	499	1609	426	1552	-1.83808	5.51579e-134
Zbtb48	0.554013	63	13	55	18	2.3438	4.73295e-05
Zcchc11	1.13985	145	54	155	61	1.61054	9.42304e-10
Zfhx4	1.93222	713	16	765	23	6.26526	9.15189e-186
Zfp13	0.504168	35	15	47	16	1.7512	0.0122632
Zfp141	2.15327	49	127	53	122	-1.17346	6.79476e-07
Zfp146	4.5697	383	749	319	690	-1.02382	6.63501e-27
Zfp239	-0.214371	31	108	24	112	-1.44824	1.66447e-10
Zfp28	0.309019	76	38	96	32	1.67273	0.00108086
Zfp286	0.193443	97	13	97	10	4.0938	2.96947e-16
Zfp36l1	6.04997	116	14	201	29	2.90932	2.69419e-20
Zfp36l2	4.80441	70	0	44	1	8.47518	1.32829e-11
Zfp456	-0.455531	13	36	13	56	-1.17012	0.00293966
Zfp618	1.93854	421	180	457	159	1.52758	2.5573e-22
Zfp677	-1.32552	27	6	17	2	4.01689	0.00224833
Zfp692	1.30737	54	23	61	26	1.40244	0.00166985
Zfp71-rs1	1.87931	11	36	16	36	-1.2873	0.0145778
Zfp72	0.292987	67	3	49	4	5.2063	3.25662e-10
Zfp874a	0.593171	25	7	27	12	1.82489	0.0402567
Zfp930	3.56843	117	41	106	41	1.50229	2.94269e-07
Zfp941	-2.29937	0	28	1	26	-2.96171	1.43458e-06
Zfp97	-0.3589	11	46	8	26	-1.25301	0.00578514
Zhx1	2.40429	403	156	385	157	1.41718	3.26891e-22
Zhx3	0.822789	154	60	157	96	1.27405	0.000369744
Zim1	-0.65752	40	0	91	1	6.00831	9.38351e-12
Zscan22	1.95042	68	147	61	164	-1.12681	2.70084e-07
Zyx	6.74209	789	363	1149	372	1.30386	9.80033e-36
